# Supplementary material for: Residential green space and child intelligence and behavior across urban, suburban, and rural areas in Belgium: A longitudinal birth cohort study of twins
Source: PubMed Central journal article supplement (PMC7446904; doi:10.1371/journal.pmed.1003213), 2020-08-18
Supplement: pmed.1003213.s002.pdf [file pmed.1003213.s002.pdf]

**Online questionnaire completed by mother of the twin**

Last name and first name mother:

.....

Email address (optional): .....

Birth data twins: .....

First name child 1 (=first born twin):

.....

First name child 2 (=second born twin):

.....

If you have further comments concerning your personal information, you can write them down here. For example, an address change.

.....  
 .....  
 .....

What were the previous addresses of the children where they lived together? When did they live there? *We want to emphasize that the Data will be stored in a confidential way, in which your name will be replaced by a code.*

|                               | Street | Number | City | From (year) | Till (year) |
|-------------------------------|--------|--------|------|-------------|-------------|
| Last address before pregnancy |        |        |      |             |             |
| Address during pregnancy      |        |        |      |             |             |
| Birth address twin            |        |        |      |             |             |
| Address 2                     |        |        |      |             |             |
| Address 3                     |        |        |      |             |             |
| Address 4                     |        |        |      |             |             |
| Address 5                     |        |        |      |             |             |
| Address 6                     |        |        |      |             |             |

If you have further comments, you can write them down here.

.....  
 .....  
 .....

What is the highest diploma of your children? If your children following education at the moment and are in the process of obtaining a degree, you can indicate the future highest degree.

|                                                              | Child 1                  | Child 2                  |
|--------------------------------------------------------------|--------------------------|--------------------------|
| <b>No Diploma</b>                                            | <input type="checkbox"/> | <input type="checkbox"/> |
| <b>Primary education</b>                                     | <input type="checkbox"/> | <input type="checkbox"/> |
| <b>Low secondary education (till 3th year)</b>               | <input type="checkbox"/> | <input type="checkbox"/> |
| <b>Higher secondary education (till 6<sup>th</sup> year)</b> |                          |                          |
| • BSO                                                        | <input type="checkbox"/> | <input type="checkbox"/> |
| • TSO or KSO                                                 | <input type="checkbox"/> | <input type="checkbox"/> |
| • ASO                                                        | <input type="checkbox"/> | <input type="checkbox"/> |
| <b>Higher education</b>                                      |                          |                          |
| • Higher education short type (max. 3 years)                 | <input type="checkbox"/> | <input type="checkbox"/> |
| • Higher education long type (4 years or more)               | <input type="checkbox"/> | <input type="checkbox"/> |
| • University: Bachelor                                       | <input type="checkbox"/> | <input type="checkbox"/> |
| • University: Master                                         | <input type="checkbox"/> | <input type="checkbox"/> |
| <b>Other:</b> .....                                          | <input type="checkbox"/> | <input type="checkbox"/> |

Which of the following situations are your children in at the moment?

|               | Child 1                  | Child 2                  |
|---------------|--------------------------|--------------------------|
| Full-time job | <input type="checkbox"/> | <input type="checkbox"/> |
| Part-time job | <input type="checkbox"/> | <input type="checkbox"/> |
| Student       | <input type="checkbox"/> | <input type="checkbox"/> |
| Unemployed    | <input type="checkbox"/> | <input type="checkbox"/> |
| Other: .....  | <input type="checkbox"/> | <input type="checkbox"/> |
